# Supplementary material for: Inhibitory Effect of Ulmus davidiana and Cornus officinalis Extracts on Osteoporotic Bone Loss In Vitro and In Vivo
Source: MDPI journal article supplement (doi:10.3390/medicina58040466), 2022-03-23
Supplement: s1 [file s1]

# Inhibitory Effect of *Ulmus davidiana* and *Cornus officinalis* extracts in vitro and in vivo

Jeonghyun Kim<sup>1,2,†</sup>, Chang Gun Lee<sup>1,2,†</sup>, Seung Hee Yun<sup>1,2</sup>, Seokjin Hwang<sup>1,2</sup>, Hyoju Jeon<sup>1,2</sup>, Eunkuk Park<sup>1,2,\*</sup> and Seon-Yong Jeong<sup>1,2,\*</sup>

**Supplementary Table S1.** Gene specific primers used in this study.

| Gene          | Primer sequence                                                                                  |
|---------------|--------------------------------------------------------------------------------------------------|
| <i>Alpl</i>   | Forward: 5'-TCC CAC GTT TTC ACA TTC GG-3'<br>Reverse: 5'-CCC GTT ACC ATA TAG GAT AGC C-3'        |
| <i>Runx2</i>  | Forward: 5'-TAA AGT GAC AGT GGA CGG TCC C-3'<br>Reverse: 5'-AAT GCG CCC TAA ATC ACT GAG G-3'     |
| <i>Bglap</i>  | Forward: 5'-TAG TGA ACA GAC TCC GGC GCT A-3'<br>Reverse: 5'-TGT AGG CGG TCT TCA AGC CAT-3'       |
| <i>Ctsk</i>   | Forward: 5'-AAT ACC TCC CTC TCG ATC CTA CA-3'<br>Reverse: 5'-TGG TTC TTG ACT GGA GTA ACG TA-3'   |
| <i>Acp5</i>   | Forward: 5'-TGG TAT GTG CTG GCT GGA AAC-3'<br>Reverse: 5'-GCA GAG GCA TAC TTG TAC CG-3'          |
| <i>Mmp9</i>   | Forward: 5'-GCA GAG GCA TAC TTG TAC CG-3'<br>Reverse: 5'-TGA TGT TAT GAT GGT CCC ACT TG-3'       |
| <i>Nfatc1</i> | Forward: 5'-GGA GAG TCC GAG AAT CGA GAT-3'<br>Reverse: 5'-TTG CAG CTA GGA AGT ACG TCT-3'         |
| <i>Gapdh</i>  | Forward: 5'-AGG TCG GTG TGA ACG GAT TTG-3'<br>Reverse: 5'-TGT AGA CCA TGT AGT TGA GGT CA-3'      |
| <i>Hprt</i>   | Forward: 5'-GAG GAG TCC TGT TGA TGT TGC CAG-3'<br>Reverse: 5'-GGC TGG CCT ATA GGC TCA TAG TGC-3' |

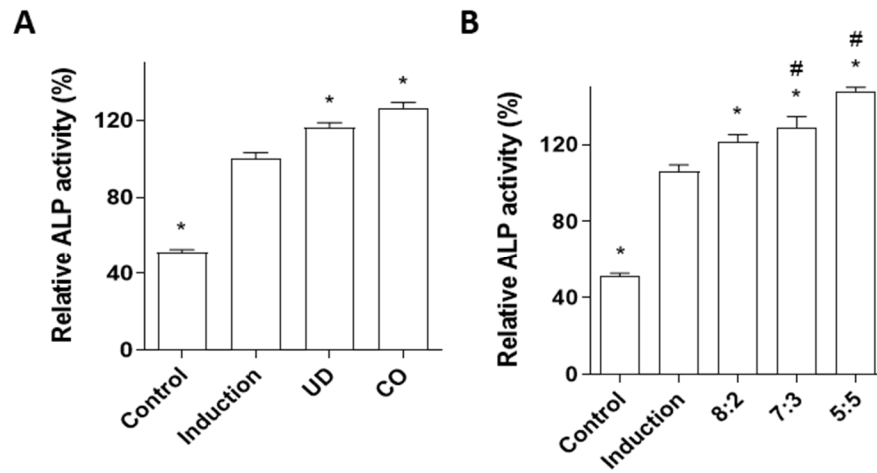

**Supplementary Figure S1.** Effects of single UD, CO extract and their combination on ALP activity in mouse preosteoblast MC3T3-L1 cells. Preosteoblast MC3T3-E1 cells were co-treated with osteoblast induction medium and 10  $\mu\text{g/mL}$  of (A) single UD, CO extract or (B) their combinations (8:2, 7:3 and 5:5). ALP activity was assessed using p-nitrophenylphosphate. UD; UD treatment, CO; CO treatment, \* $p < 0.05$  vs. Induction, # $p < 0.05$  vs. 8:2 (one-way ANOVA with Tukey's HSD post hoc test).

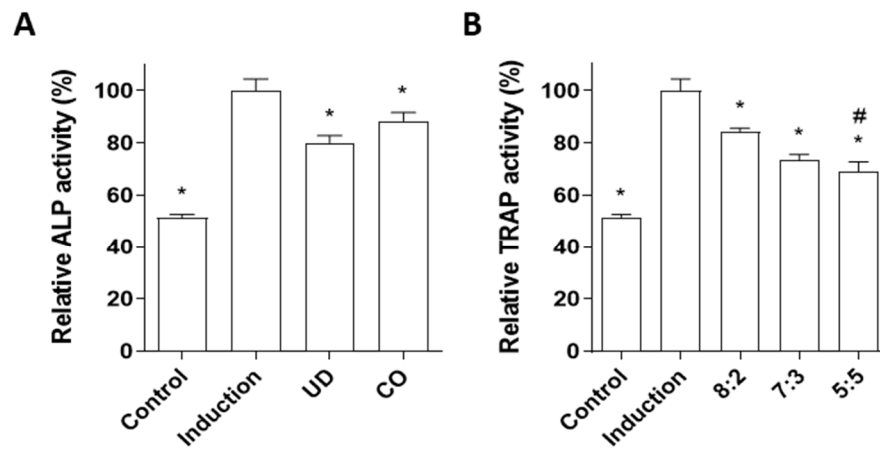

**Supplementary Figure S2.** Effects of single UD, CO extract and their combination on TRAP activity in mouse primary osteoclasts. Mouse primary monocytes were co-treated with osteoclast induction medium and 10  $\mu\text{g/mL}$  of UD, CO extract or their combination (8:2, 7:3 and 5:5) for 5 days. TRAP activity was measured using Acid-Phosphatase Kit. UD; UD treatment, CO; CO treatment, \* $p < 0.05$  vs. Induction, # $p < 0.05$  vs. 8:2 (one-way ANOVA with Tukey's HSD post hoc test).
